1 **SV40 polyomavirus activates the Ras-MAPK signaling pathway for**  
2 **vacuolization, cell death, and virus release**

3 Running title: SV40 signaling, vacuolization, and release

4

5 Nasim Motamedi<sup>1</sup>, Xaver Sewald<sup>2</sup>, Yong Luo<sup>3</sup>, Walther Mothes<sup>2</sup> and Daniel DiMaio<sup>3,5,6,7,#</sup>

6

7 <sup>1</sup> Max von Pettenkofer-Institut für Hygiene und Medizinische Mikrobiologie, Medizinische  
8 Fakultät, LMU München, 80336 Munich, Germany.

9 <sup>2</sup> Max von Pettenkofer Institute & Gene Center, Virology, National Reference Center for  
10 Retroviruses, Faculty of Medicine, LMU München, Munich, Germany

11 <sup>3</sup> Department of Genetics, Yale School of Medicine, P.O. Box 208005, New Haven, CT  
12 06520-8005

13 <sup>4</sup> Department of Microbial Pathogenesis, Yale School of Medicine, 295 Congress Avenue,  
14 New Haven, CT 06519-1418

15 <sup>5</sup> Department of Molecular Biophysics & Biochemistry, Yale School of Medicine, P.O. Box  
16 208024, New Haven, CT 06520-8024

17 <sup>6</sup> Therapeutic Radiology, Yale School of Medicine, P.O. Box 208040, New Haven, CT  
18 06520-8040

19 <sup>7</sup> Yale Cancer Center, P.O. Box 208028, New Haven, CT 06520-8028

20

21 # Corresponding author: [daniel.dimaio@yale.edu](mailto:daniel.dimaio@yale.edu)

22

23 Keywords: Simian virus 40, vacuoles, GM1, lytic infection, progressive multifocal  
24 leukoencephalopathy, PML, JCV, BKV, Ras

25 Word count: Abstract: 195; Text: 5,843 (excluding refs, table footnotes; legends)

26 **ABSTRACT**

27 Polyomaviruses are a family of small, non-enveloped DNA viruses that can cause severe  
28 disease in immunosuppressed individuals. Studies with SV40, a well-studied model  
29 polyomavirus, have revealed the role of host proteins in polyomavirus entry and trafficking to  
30 the nucleus, viral transcription and DNA replication, and cell transformation. In contrast, little  
31 is known about host factors or cellular signaling pathways involved in the late steps of  
32 productive infection leading to polyomavirus release. We previously showed that cytoplasmic  
33 vacuolization, a characteristic late cytopathic effect of SV40, depends on the specific  
34 interaction between the major viral capsid protein VP1 and its cell surface ganglioside  
35 receptor GM1. Here we show that late during infection, SV40 activates a signaling cascade in  
36 permissive CV-1 monkey cells involving Ras, Rac1, MKK4 and JNK to induce SV40-specific  
37 cytoplasmic vacuolization and subsequent cell lysis and virus release. Inhibition of individual  
38 components of this signaling pathway inhibits vacuolization, lysis and virus release, even  
39 though high-level intracellular virus replication occurs. The identification of this pathway for  
40 SV40-induced vacuolization and virus release provides new insights into the late steps of non-  
41 enveloped virus infection and reveals potential drug targets for the treatment of diseases  
42 caused by these viruses.

43

44 **IMPORTANCE**

45           The polyomaviruses are small DNA viruses that include important model viruses and  
46 human pathogens that can cause fatal disease, including cancer, in immunosuppressed  
47 individuals. There are no vaccines or specific antiviral agents for any polyomavirus. Here, we  
48 show that late during infection, SV40 activates a signaling cascade involving Ras, Rac, and  
49 JNK that is required for cytoplasmic vacuolization and efficient virus release. This pathway  
50 may represent a new point of intervention to control infection by these viruses.

51

## 52 INTRODUCTION

53 The polyomaviruses are small, non-enveloped, double-stranded DNA tumor viruses  
54 that include pathogenic human viruses such as BK polyomavirus (BKPyV), JC polyomavirus  
55 (JCPyV), and Merkel Cell polyomavirus (MCPyV), as well as the extensively studied model  
56 viruses, murine polyomavirus and the simian virus, SV40. MCPyV, the most recently  
57 discovered human tumor virus, is responsible for most cases of Merkel cell carcinoma, a rare  
58 but aggressive form of skin cancer. BKPyV is associated with inflammation of the urogenital  
59 tract and nephropathy, which can result in organ loss in renal transplant patients, as well as  
60 hemorrhagic cystitis in bone marrow transplant recipients [reviewed in (1)]. JCPyV is the  
61 causative agent of progressive multifocal leukoencephalopathy (PML), a rare but usually fatal  
62 central nervous system demyelinating disease in immunocompromised individuals or patients  
63 receiving immunomodulatory monoclonal antibody treatment for various disorders (2).  
64 JCPyV and BKPyV infections are common in the human population. These viruses are  
65 phylogenetically closely related to SV40, which can cause PML-like brain pathology in  
66 immunosuppressed monkeys (3, 4). Therefore, SV40 serves as a model to study human  
67 polyomavirus pathogenesis, including neurological disease.

68 Productive polyomavirus infection of permissive cells can be divided into early and  
69 late phases. The early steps include virus binding to the cell surface, entry of virus particles  
70 into the cell, and trafficking of the viral genome to the nucleus where viral gene expression  
71 and DNA replication occur. Polyomavirus entry is initiated by binding of the major capsid  
72 protein VP1 to carbohydrate motifs on cell surface molecules. In the case of SV40, the  
73 ganglioside GM1 serves as the cellular receptor for infection. After endocytosis,  
74 polyomaviruses are transported to the endoplasmic reticulum (ER), where host factors initiate  
75 the disassembly of capsids and translocation of the viral genome and residual capsid into the  
76 cytoplasm for transport into the nucleus (5, 6). Expression of the early viral proteins including  
77 Large and small T antigen is followed by viral DNA replication, expression of the late viral

78 proteins including VP1, and capsid assembly, which occurs primarily in the nucleus before  
79 cells are lysed and mature infectious virus particles are released.

80 The initial interaction of a variety of polyomaviruses with cells acutely induces  
81 transient cellular signaling that supports the early steps of infection. JC virus induces ERK  
82 phosphorylation within minutes after receptor binding (7), which is required for the early  
83 stages of infection (8). Within the first two hours of infection, murine polyomavirus induces  
84 phosphoinositide 3' kinase and Fak signaling pathways through binding of VP1 to  
85 gangliosides and  $\alpha 4$ -integrin (9-11). Inhibition of these signaling events can inhibit the early  
86 steps of murine polyomavirus infection. This virus also induces a second, delayed wave of  
87 mitogenic signaling that depends on viral early gene expression (11). Cell signaling also  
88 modulates productive SV40 infection (12). Binding of SV40 to GM1 at the plasma membrane  
89 triggers activation of more than 50 different kinases regulating the early steps of SV40  
90 infection including local activation of tyrosine kinases to reorganize actin filaments for  
91 caveolin-1- or lipid raft-dependent SV40 internalization (13).

92 In contrast to the early stages of polyomavirus infection, late events leading to the  
93 release of virus particles are poorly understood. Viral proteins have been reported to facilitate  
94 SV40 release from cells. The late protein VP4 was reported to function as a viroporin with  
95 membrane-destabilizing properties that facilitates virus release, but these results have recently  
96 been challenged (14, 15). Furthermore, since VP4 is mostly found within the nucleus of  
97 infected cells, the mechanism leading to plasma membrane perforation and virus release is  
98 unclear. The minor capsid proteins VP2 and VP3 were also shown to support membrane  
99 permeabilization for virus release (14). These proteins can insert into or disrupt membranes  
100 when ectopically over-expressed in prokaryotic as well as eukaryotic cells.

101 SV40 infection of African green monkey cells leads to the appearance of characteristic  
102 cytoplasmic vacuoles late during infection, a phenomenon that led to the discovery of this  
103 virus in 1960 (16). We recently showed that vacuolization is triggered by the interaction

104 between VP1 and GM1 at the cell surface (17, 18). SV40-induced vacuolization typically  
105 occurs late in infection. However, if large amounts of SV40 are added to cells, vacuoles can  
106 form acutely (17, 19). Virus replication is not required for vacuole formation, and purified  
107 VP1 pentamers are sufficient to induce vacuole formation. We hypothesized that the VP1-  
108 GM1 interaction triggers an as-yet-unidentified signaling cascade resulting in vacuolization  
109 (17).

110       Extensive cell vacuolization has also been observed in other experimental systems.  
111 Pore-forming toxins of various pathogens can induce the formation of cellular vacuoles and  
112 cell death (20, 21). Different types of intrinsic cell death programs, such as paraptosis and  
113 methuosis, are also associated with vacuole formation (20, 22). Cell signaling pathways  
114 including the Ras-MAPK pathway have been shown to contribute to vacuolization and non-  
115 apoptotic cell lysis in these processes (22, 23). However, cellular factors or signaling  
116 pathways have not been identified that are involved in vacuolization or other late events  
117 during SV40 infection.

118       In this study, we investigate the mechanism by which SV40 infection results in  
119 efficient virus release. We show that activation of the Ras-Rac1-MKK4-JNK signaling  
120 pathway late during SV40 infection results in vacuolization and ultimately facilitates cell lysis  
121 and release of progeny virus. Understanding the mechanism of polyomavirus release may  
122 allow the identification of proteins and pathways that can potentially be exploited as specific  
123 anti-viral drug targets for polyomaviruses and possibly other pathogenic, non-enveloped  
124 viruses.

125

## 126 **RESULTS**

### 127 **Phenotypic characterization of SV40-induced vacuoles**

128 We recently demonstrated that SV40-induced vacuole formation is triggered by binding of  
129 oligomeric VP1 to GM1 (17). Vacuolization typically occurs late during infection, but a  
130 detailed analysis of vacuole formation and its consequences for SV40 infection is lacking. We  
131 conducted physiological experiments, immune staining and live cell imaging to better  
132 characterize SV40-induced vacuoles. Vacuoles present 48 h.p.i. displayed an endocytic  
133 character as demonstrated by the rapid uptake of fluorescent low-molecular weight dextran  
134 (3kDa Dextran-Alexa488) from the culture medium (Fig. 1A). The endosomal nature of  
135 vacuoles was supported by immunostaining infected cells with antibodies against the early  
136 and late endosomal proteins EEA1 and Rab7, respectively, which revealed staining distributed  
137 around the circumference of vacuoles (Fig. 1B), presumably indicating the presence of these  
138 proteins of the vacuolar membrane. Although strong aggregation of the endoplasmic  
139 reticulum (ER) protein BiP was observed after infection, indicative of a cellular stress  
140 response, BiP was absent from vacuoles, suggesting that SV40-induced vacuoles are not  
141 composed of ER membranes (Fig. 1B).

142 Because vacuole formation is triggered by the interaction between VP1 and GM1, we  
143 assessed whether GM1 is present in vacuoles. To determine the localization of GM1 during  
144 SV40-induced vacuole formation late during infection, infected and uninfected CV-1 cells  
145 expressing fluorescently-tagged Lamp1-RFP fusion protein were treated with fluorescently-  
146 labelled GM1 (BODIPY-GM1) and analysed by confocal microscopy. In contrast to mock-  
147 infected cells where GM1 displayed diffuse punctate staining, in infected cells GM1 (as well  
148 as the late endosomal/lysosomal marker Lamp1) was present at the limiting membrane of  
149 vacuoles (Fig. 1C). Endogenous GM1 displayed a similar distribution in vacuolar membranes  
150 48 h.p.i. as assessed by staining with fluorescent cholera toxin B (CtxB-Alexa488) which, like  
151 VP1, binds to GM1 (Fig. 1D). In addition, strong patches of GM1 were present within some

152 vacuoles (arrows) (Figs. 1C and 1D, regions of interest (ROI)), suggesting the existence of  
153 complex vesicular structures containing GM1 in infected cells.

154 To visualize the dynamics of vacuole formation and maturation, we conducted live-  
155 cell imaging using spinning-disk confocal microscopy of SV40-infected CV-1 cells  
156 transiently co-expressing fluorescently-tagged versions of the early endosome marker YFP-  
157 Rab5 and the lysosome marker Lamp1-RFP. Both marker proteins localized to vacuole  
158 membranes (Fig. 2). Fusion of Rab5-positive vacuoles was observed, indicating that the  
159 formation of large vacuoles was the result of fusion, not osmotic vesicle swelling (Fig. 2A;  
160 Movie 1). In addition, some Rab5-positive vacuoles matured into vacuoles containing Lamp1  
161 (Fig. 2B; Movie 2), indicating that a dynamic endosomal system was involved in vacuole  
162 formation.

163

#### 164 **Vacuole formation requires Ras activity**

165 Expression of activated Ras can lead to vacuole formation in glioblastoma and other  
166 cancer cell lines (22). To test for a role of Ras in SV40-induced cell vacuolization, we used a  
167 dominant-negative (DN) form of Harvey-Ras (HRas S17N), which inhibits the activation of  
168 all three Ras isoforms (H-, K- and N-Ras) (24). Plasmids expressing wild-type (WT) or DN  
169 versions of H-Ras, both fused to mEGFP, were transfected into CV-1 cells, which were  
170 infected 12 hours later with SV40. At 48 h p.i., Wild-type mEGFP-HRas co-localized to the  
171 membranes of vacuoles with VP1, but did not affect vacuolization as assessed by VP1  
172 immunostaining and fluorescence microscopy (Fig. 3, upper panels and ROI). In contrast,  
173 expression of DN mEGFP-HRas S17N potently blocked SV40-induced vacuolization, even  
174 though VP1 was abundantly expressed (Fig. 3, lower panels). Flow cytometry of large T  
175 antigen expression in CV-1 cells gated for Ras-GFP expression revealed no difference in  
176 SV40 infection efficiency in cells expressing wild-type compared to DN mEGFP-HRas



177 (Supplemental Fig. S1). These results indicate that Ras signalling is required for SV40-  
178 induced vacuole formation but not for SV40 infection.

179

### 180 **Vacuolization precedes cell lysis and SV40 release**

181 To study the temporal relationship between SV40-induced vacuolization and progression of  
182 the virus life cycle, CV-1 cells were infected with wild-type SV40 at MOI 10, and  
183 vacuolization was monitored every 12 hours by bright-field microscopy. Small vacuoles first  
184 appeared at 36 h.p.i., with a pronounced vacuolization evident by 48 h.p.i. (Fig. 4A, C).  
185 Vacuolization reached a plateau at around 60 h.p.i. As expected, the appearance of vacuoles  
186 correlated with the expression of VP1, which became prominent around 36 h.p.i. as assessed  
187 by immunoblotting and grew stronger at later times (Fig. 4B).

188 To examine the temporal relationship between virus production and vacuole  
189 formation, we measured cell-associated and released infectious SV40. We infected CV-1 cells  
190 with SV40 at MOI of 10, and at various times p.i. the supernatant was collected as a source of  
191 released virus. At the same time points, the cells were lysed by freeze-thawing as a source of  
192 cell-associated virus. Infectious virus in both samples was quantified by infecting naïve CV-1  
193 cells and enumerating large T antigen-positive cells by flow cytometry 24 h.p.i. As shown in  
194 Fig. 4C, the timing and extent of vacuolization was virtually congruent with the production of  
195 cell-associated virus, which first appeared at 36 h.p.i. In contrast, significant amounts of  
196 infectious SV40 in the supernatant were first detected 48 h.p.i. and continuously increased  
197 until the end of the observation period at 72 h.p.i. Finally, we assessed cell lysis by measuring  
198 the release of the intracellular enzyme lactate dehydrogenase (LDH) into the supernatant.  
199 LDH levels in the supernatant coincided with released SV40 (Fig. 4C). Thus, cell lysis and  
200 release of significant amounts of virus lag approximately 12 hours behind intracellular virus  
201 production and vacuolization.

202

203 **SV40 induces MAPK signaling late during infection**

204 Infection by polyomaviruses at high MOI transiently activates cellular mitogenic  
205 signaling pathways, including the MAP kinase pathways, which are triggered by Ras  
206 activation (9-12). To determine whether the MAP kinase pathway was activated at late times  
207 after SV40 infection, when vacuoles typically form, we used phospho-site specific antibodies  
208 and western blotting to examine phosphorylation of the signaling proteins JNK, p38, and  
209 ERK. At 48 h.p.i., pronounced phosphorylation of JNK (Thr183/Tyr185), p38  
210 (Thr180/Tyr182) and ERK (Thr202/Tyr204) was observed (Fig. 5A), with little difference in  
211 the total amount of these proteins, indicating broad activation of these signaling pathways in  
212 response to SV40 infection. We also examined the time course of MAP kinase signaling by  
213 analysing a series of time points beginning at 12 h.p.i., long after the acute phase of signaling  
214 has terminated. This analysis revealed the presence of progressive phosphorylation of JNK,  
215 ERK and p38 beginning as early as 24 h p.i. (Fig. 5B). Activation of signaling pathways at  
216 cell membranes can lead to JNK1/2 phosphorylation through the action of MKK4, a  
217 membrane-proximal kinase. To determine the phosphorylation status of the MKK4 during  
218 SV40 infection, we conducted western blot analysis of MKK4 phosphorylation at serine 257  
219 and threonine 261. This analysis revealed the presence of phospho-MKK4 by 48 h.p.i. (Fig.  
220 5B). Although MKK4 phosphorylation was detected at later times than JNK phosphorylation,  
221 we believe that this is due to the lower sensitivity of the phospho-MKK4 antibody. After  
222 phosphorylation, activated MAP kinases translocate into the nucleus and regulate gene  
223 expression by phosphorylating transcription factors such as ATF-2 and c-Jun. Consistent with  
224 activation of MAP kinase signaling, ATF-2 and c-Jun were phosphorylated late during SV40  
225 infection, when VP1 expression became abundant (Fig. 5B).

226

227 **JNK, MKK4, and Rac1 are required for vacuolization and SV40 release**

228 To determine the role of specific signaling pathways in vacuolization and SV40 release, we  
229 tested whether chemical and genetic inhibitors that blocked signaling affected these processes.  
230 Starting at 12 h.p.i., CV-1 cells were treated with chemical inhibitors targeting JNK  
231 (SP600125), p38 (SB203580) and MEK (Selumetinib), a key component of the ERK  
232 pathway. Inhibitory activity was confirmed by western blot analysis showing reduced target  
233 protein phosphorylation 48 h.p.i. (Fig. 6A). Vacuolization of cells treated with the inhibitors  
234 was examined two days p.i. Strikingly, the JNK inhibitor, SP600125, completely blocked  
235 vacuole formation, whereas p38 inhibition had no effect compared to vehicle alone (Figs. 6B  
236 and 6C). The ERK pathway inhibitor caused a significant reduction in vacuolization, but  
237 strong cytotoxic effects were observed during treatment of non-infected cells with this  
238 compound (Supplemental Fig. S2A). We conclude that the lack of vacuoles in ERK-inhibited  
239 cells is likely a consequence of accelerated cell death and detachment of cells rather than a  
240 true suppression of vacuolization.

241 Inhibition of JNK also inhibited SV40-induced cell lysis by 50% (Fig. 6D) and caused  
242 a 6-fold reduction of SV40 release with respect to cell-associated virus (Figs. 6E, S2B, and  
243 S2C). In contrast, treatment of infected cells with the MEK or p38 inhibitor did not reduce  
244 cell lysis or SV40 release. Treatment of cells with inhibitors did not interfere with early steps  
245 of SV40 infection as assessed by flow cytometry for large T antigen expression  
246 (Supplemental Fig. S2D), suggesting that the JNK signaling pathway is specifically required  
247 late in infection for vacuolization, cell lysis, and efficient virus release.

248 To assess the role of MKK4 in SV40-induced vacuolization and virus release, we used  
249 three shRNAs with different *mkk4* target sequences to generate CV-1 cells with stable MKK4  
250 knock-down (Fig. 7A). MKK4 knock-down by each of these shRNAs reduced SV40-induced  
251 cell vacuolization (Figs. 7B and 7C) and cell lysis (Fig. 7D) compared to scrambled shRNA  
252 control. Notably, MKK4 knock-down also caused a significant reduction of SV40 release  
253 from infected cells compared to cell-associated SV40 (Fig. 7E; Supplemental Figs. S3A and

254 S3B). MKK4 knock-down did not affect the efficiency of SV40 infection as assessed by  
255 intracellular virus production (Supplemental Fig. S3A), and by flow cytometry and western  
256 blotting for large T antigen and VP1 expression (Supplemental Figs. S3C and S3D).

257 JNK and MKK4 signaling is required for methuosis, a Ras-dependent form of cell  
258 death characterized by extensive vacuolization (25). The small GTPase Rac1 has been  
259 identified as a mediator of methuosis upstream of MKK4 and JNK. Therefore, we tested the  
260 role of Rac1 in SV40-induced vacuolization, cell lysis, and virus release. Treatment of CV-1  
261 cells 12 h.p.i. with the specific Rac1 inhibitor EHT1864 blocked downstream phosphorylation  
262 of MKK4 compared to vehicle-treated cells, confirming inhibition of the Rac1-MKK4-JNK  
263 signaling cascade (Fig. 8A). Rac1 inhibition also significantly reduced cell vacuolization  
264 (Figs. 8B and 8C), cell lysis (Fig. 8D), and release of infectious SV40 (Fig. 8E; Supplemental  
265 Figs. S4A and S4B). Production of intracellular virus and SV40 infectivity were not inhibited  
266 by EHT1864 (Supplemental Figs. S4A and S4C). Taken together, these results support a  
267 model in which a Ras-dependent cell signaling cascade involving Rac1-MKK4-JNK induces  
268 extensive cell vacuolization, followed by cell lysis and SV40 release.

269 **DISCUSSION**

270 Activation of cellular signaling pathways is important during various steps in virus life cycles.  
271 For example, virus binding to its surface receptor often triggers signaling cascades that  
272 facilitate virus entry and replication. We previously reported that intracellular SV40 VP1  
273 expression alone does not induce vacuolization and that SV40 particles and VP1 are absent  
274 from the vacuolar lumen in infected CV1 cells or CV1 cells undergoing vacuolization in  
275 response to acute treatment with VP1 pentamers (17). These findings suggest that  
276 vacuolization is the result of a signaling cascade triggered at the cell surface. In this report,  
277 we show that in addition to signaling occurring early in infection, SV40 also induces the  
278 MAPK signaling cascade during the late stage of infection when large amounts of VP1  
279 accumulate to support vacuolization and efficient virus release.

280         Several findings reported here suggest that progeny SV40 particles bind to GM1 at the  
281 plasma membrane and trigger GM1-dependent Ras activation and vacuolization to support  
282 further virus release. Live cell microscopy of SV40-infected CV-1 cells revealed that SV40-  
283 induced vacuoles display a dynamic endocytic nature, consistent with vacuolization having a  
284 signaling basis. We also show that VP1 co-localizes with GM1 and Ras at the limiting  
285 membrane of SV40-induced vacuoles arising late in infection. Most importantly, we showed  
286 that dominant-negative Ras S17N or inhibition of JNK signaling inhibits vacuole formation.  
287 Overall, we hypothesize that in response to SV40-induced clustering of GM1, Ras is activated  
288 and triggers MAPK signaling through Rac1-MKK4-JNK, which results in vacuolization and  
289 subsequent cell lysis and virus release.

290         Previously published work is consistent with this model. GM1 clustering has been  
291 reported to modify active HRas distribution in membrane nanodomains (26), and  
292 overexpression of constitutively-active HRas (HRas G12V) leads to extensive vacuolization  
293 in glioblastoma cells, with Ras localized at the limiting membrane of cytoplasmic vacuoles  
294 (22, 23). Like vacuoles formed during SV40 infection, HRas-induced vacuole formation in

295 glioblastoma cells was independent of ERK signaling (23) and blocked by chemical inhibition  
296 of Rac1(27). Furthermore, in both Ras-activated glioblastoma cells and SV40-infected cells,  
297 vacuoles contain markers such as Lamp-1 and undergo extracellular fluid uptake resembling  
298 macropinocytosis (22, 23, 28).

299         Although Ras and VP1 co-localize in vacuolar membranes (Fig. 1C), we have not  
300 determined the cellular compartment where GM1-dependent Ras activation occurs during  
301 SV40 infection. GM1 can localize to several different membrane compartments including the  
302 plasma membrane, Golgi network and the ER, and the ceramide structure of GM1 influences  
303 its trafficking into various cellular compartments (29). Similarly, Ras localizes not only to the  
304 plasma membrane but also to internal membranes such as the limiting membranes of  
305 endosomes, the ER and the Golgi network (30). FRET-based assays demonstrated that EGF  
306 stimulation changed the distribution of endogenous active Ras from the plasma membrane to  
307 endosomal-like intracellular vesicles, the Golgi network and the ER (31). Moreover, the  
308 subcellular localization of active Ras influences signaling through downstream effector  
309 pathways (32). Thus, SV40 may activate Ras in various cellular compartments at different  
310 steps during the viral life cycle, with different biological consequences.

311         Time course analysis of SV40-induced late cellular signaling revealed that it precedes  
312 vacuolization, cell lysis and virus release. Active phosphorylated forms of JNK were detected  
313 24-36 h.p.i., coincident with VP1 expression, followed by phosphorylation of nuclear  
314 transcription factors. Unlike the acute transient signaling induced upon virus cell binding, this  
315 late phase signaling is sustained. Activation of cell signaling preceded vacuole formation with  
316 the first vacuoles emerging at 36-48 h.p.i., prior to cell lysis and virus release. Although other  
317 cellular kinases such as p38 and ERK were also activated during SV40 infection, inhibitor  
318 experiments revealed that only the JNK pathway is essential for vacuolization, cell lysis and  
319 efficient virus release. Importantly, inhibition of JNK, Ras, and MKK4 activity or expression  
320 did not interfere with SV40 entry and intracellular replication, so the impaired late events do

321 not merely reflect an early replication block. This is consistent with an earlier published report  
322 that MAPK/ERK signaling is not required for the early response to SV40 infection (12) and  
323 with a recent genome-wide analysis of kinases that contribute to SV40 endocytosis, which did  
324 not detect a requirement for MAPK signaling (13). We conclude that Ras-Rac1-MKK4-JNK  
325 signaling is essential late during SV40 infection for vacuolization and cell death leading to  
326 virus release, whereas other signaling pathways are dispensable.

327 In agreement with previous studies (33), we showed that infectious SV40 first appears  
328 at low levels in the supernatant as early as 36 h.p.i. The release of virus at this early time  
329 might occur due to the first cells that lyse or to non-lytic virus release. We hypothesize that  
330 SV40 released from cells around this time binds to the plasma membrane of the same and  
331 neighboring infected cells and induces cell signaling, which in turn stimulates cell lysis and  
332 subsequent increased virus release from these cells, thus establishing a positive feedback loop  
333 that stimulates further signaling and virus release. This model is similar to our earlier analysis  
334 of vacuolization during SV40 infection (17), in which we proposed that the first released virus  
335 binds to cell surface GM1 and stimulates vacuole formation late during infection. We extend  
336 the model here to include virus release as well as vacuolization as a phenotype that can be  
337 acutely triggered late in infection by the first progeny virus released. Thus, the initial wave of  
338 released virus primes the infected cell population for more pronounced vacuolization and  
339 enhanced virus release.

340 To complete the virus life cycle, polyomaviruses release depends on lysis of the  
341 infected cell. Whether cell death is the consequence of plasma membrane rupture resulting  
342 from extensive virus production or a regulated process depending on active cellular signaling  
343 was heretofore unclear. Here, we show that high levels of intracellular virus are not sufficient  
344 for efficient release and that cellular MAPK signaling is necessary for optimal cell lysis and  
345 SV40 release. This lytic process resembles methuosis, which, as noted above, is a Rac1-

346 dependent cell death pathway displaying characteristic cellular vacuolization occurring after  
347 ectopic expression of oncogenic Ras (22, 23, 34).

348         Vacuolization and virus release are both facilitated by MAPK signaling and  
349 vacuolization precedes virus release. If activation of the Ras-MAPK signaling cascade  
350 independently induces both vacuole formation and virus release, vacuolization is a convenient  
351 marker for the signaling events that foster efficient release. Alternatively, it is possible that  
352 signaling leads to vacuolization, and that vacuolization itself facilitates subsequent cell death  
353 and enhanced virus release.

354         In addition to the role of cellular signaling, virus encoded proteins could also be  
355 involved in cell lysis and SV40 release. VP4 is a late SV40 protein previously reported to  
356 function as a viroporin to support virus release which disrupted membranes when ectopically  
357 added to red blood cells, liposomes or Cos-7 cells (35). However, more recent studies did not  
358 confirm the lytic activity of VP4 during SV40 infection (15). In the context of SV40  
359 replication, the expression of VP1 alone, without VP2 and VP3, leads to cell lysis and the  
360 release of viral particles, suggesting that lytic activity is mediated via VP1, likely through  
361 activation of a cellular program as reported here (14, 15).

362         Our results raise the possibility that JNK and MAPK pathway inhibitors may have a  
363 role in treating polyomavirus infections by decelerating virus propagation and spread within  
364 the host by reducing virus release. This would presumably provide a protective effect in  
365 affected tissues while immune reconstitution is underway (36). Because of the long  
366 replication cycle of human polyomaviruses and difficulties in synchronizing infection, late  
367 events are difficult to study. Nevertheless, further studies of the human pathogenic  
368 polyomaviruses may reveal that they are also affected by signaling programs late during  
369 infection. Although human polyomaviruses bind only weakly to GM1 (36), a variety of  
370 stimuli can activate the signaling elements described here. Thus, analysis of late events of



371 human polyomavirus infection might establish that this or overlapping signaling pathways are

372 viable therapeutic targets.

373

## 374 **MATERIAL and METHODS**

### 375 Cells and virus

376 CV-1 cells and SV40 776 virus DNA were purchased from American Type Culture Collection  
377 (ATCC). Cells were maintained in Dulbecco's modified Eagle's medium (DMEM)  
378 supplemented with 10% fetal bovine serum (FBS), 10 mM L-glutamine, and 10 mM HEPES  
379 (pH 7.2) in 5% CO<sub>2</sub> at 37°C. SV40 was produced from SV40 776 in a bacterial vector  
380 backbone puc19 by excision, re-ligation and transfection into CV-1 cells. When significant  
381 cell death was observed, cell cultures were subjected to multiple rounds of freeze/thaw lysis.  
382 Cellular debris was removed by centrifugation at 1,000 rpm for 5 min, and supernatants were  
383 filtered through 0.45µm syringe filters, aliquoted, and stored at -80°C. To produce higher titer  
384 virus stocks, fresh CV-1 cells were infected at MOI of 0.5 and processed as described above.

385

### 386 Virus titer quantitation

387 To quantify infectious units of SV40, serial dilutions of virus preparation, tissue culture  
388 supernatant or cell lysate were added to monolayers of 2 x 10<sup>5</sup> CV-1 cells in six-well plates.  
389 After 24 h, CV-1 cells were trypsinized, fixed, and permeabilized in methanol or with 4%  
390 PFA/0.5% Triton X-100 before being subjected to immunofluorescence staining for large T  
391 antigen and flow cytometry. In a typical infection with wild-type SV40, at 48 h.p.i. there is  
392 approximately 5 to 9-fold more virus in the supernatant than in the cell lysate.

393

### 394 Immunoblots

395 CV-1 cells were seeded at 2 x 10<sup>5</sup> in six-well plates and infected with SV40 on the following  
396 day at MOI of 10. At indicated times p.i., cells were harvested by lysis in lysis buffer (2%  
397 Triton X-100, 0.5% Na-deoxycholate, 150 mM NaCl, 25 mM Tris, 5 mM EDTA, Halt  
398 protease and phosphatase inhibitors (Thermo Scientific)). Extracts were suspended in 5 x  
399 Laemmli buffer, subjected to sonication, and boiled. Equal sample volumes were loaded on

400 SDS-PAGE for protein separation. Proteins were then transferred to 0.2  $\mu\text{m}$  polyvinylidene  
401 difluoride (PVDF) membranes in Tris/glycine transfer buffer (25 mM Tris, 192 mM glycine,  
402 and 20% methanol) for 2 h at 100V. Membranes were blocked in 5% BSA/TBST or non-fat  
403 dry milk in TBST (10 mM Tris-HCl, pH 7.4, 167 mM NaCl, 1% Tween-20) for 1 h and  
404 incubated overnight at 4°C with indicated antibodies in 5% BSA/TBST for phosphorylated  
405 targets or 5% non-fat dry milk/TBST for all others. Blots were washed in TBST and incubated  
406 for 1 h at room temperature with HRP-conjugated donkey anti-mouse/rabbit/goat (Jackson  
407 ImmunoResearch) in 5% non-fat dry milk/TBST. After washing with TBST, blots were  
408 visualized by enhanced chemiluminescence (SuperSignal West Pico/Femto  
409 Chemiluminescent Substrate, Thermo Scientific [CST]). The following primary antibodies  
410 were used for immunoblotting: anti- $\beta$ -actin (Abcam, ab #8227); anti-p-ERK (Cell Signaling  
411 Technology, CST, #4370); anti-p-JNK (CST, #4668); anti-p-p38 (CST, #4511); anti-p-MKK4  
412 (CST, #9156); anti-ERK (CST, #4695); anti-JNK (CST, #9252); anti-p38 (CST, #8690); anti-  
413 p-ATF2 (CST, #9225); anti-p-cJun (CST, #3270); anti-large T antigen (PAb, #108); anti-VP1  
414 (PAb, #597).

415

#### 416 Vacuolization assay

417 CV-1 cells were plated at a density of  $2 \times 10^5$  cells per well on six-well plates and infected  
418 with SV40 on the following day at MOI of 10. At indicated time points, vacuolization was  
419 assessed and documented by bright-field microscopy. To quantify vacuolization, a minimum  
420 of 200 cells per sample were counted under blinded conditions.

421

#### 422 Chemical inhibitor treatment

423 CV-1 cells were plated at a density of  $2 \times 10^5$  on six-well plates. On the following day, cells  
424 were infected with SV40 at MOI of 10. Twelve h.p.i. or at the time of infection (0 h.p.i.),  
425 chemical inhibitors were added at a concentration of 25  $\mu\text{M}$  to the infected and mock-treated

426 CV-1 cells. Inhibitor treatment was maintained until the end of the experiment. The following  
427 chemical inhibitors were used in this study: Selumetinib (ERK pathway inhibitor, inhibits  
428 MEK1); EHT 1864 (Rac inhibitor); SB203580 (p38 inhibitor); SP600125 (JNK inhibitor). All  
429 inhibitors were purchased from Selleckchem.

430

#### 431 qRT-PCR

432 For quantitative PCR, total RNA was extracted from  $2 \times 10^5$  cells using the RNEasy Mini Kit  
433 (Qiagen) and a maximum of 1  $\mu$ g cDNA was transcribed with the iScript™ cDNA Synthesis  
434 Kit (BioRad). The relative expression levels were assessed in triplicate on a single color  
435 detection system (BioRad CFX Connect Real-Time PCR Detection System) with the iTaq™  
436 universal SYBR Green supermix (BioRad). Genes and primers used for qPCR were as  
437 follows: GAPDH FW (TGGTATCGTGGAAGGACTCA), GAPDH RV  
438 (CCAGTAGAGGCAGGGATGAT), MKK4 FW (TGAAAAGGCACAAAGTAAACGCA),  
439 MKK4 RV (CCCAGTGTTGTTTCAGGGGAG).

440

#### 441 Dextran and BODIPY-GM1 treatment

442 CV-1 cells were plated at a density of  $2 \times 10^4$  on Lab-Tek II chambered coverglass slides  
443 (Nunc) and infected with SV40 at MOI of 100 on the following day. At 47 h.p.i., cells were  
444 incubated for 1 h with fluorescent markers. For dextran uptake assays, the cell culture medium  
445 was supplemented with 0.25 mg/ml of 3 kDa Dextran conjugated with Alexa Fluor 488  
446 (Dextran-A488, Molecular Probes). For labeling with fluorescent GM1, 5  $\mu$ M BODIPY FL  
447 C5-GM1 (Molecular Probes) was added to the cell culture medium. At 48 h.p.i., cells were  
448 thoroughly washed and fresh cell culture medium was added for imaging. Cells were imaged  
449 at 50 h.p.i. on a Nikon TE2000 spinning disk confocal microscope driven by the Velocity  
450 software package (Perkin Elmer).

451

452 Immunofluorescence

453 CV-1 cells were plated at a density of  $3 \times 10^4$  on Millicell EZ Slide four-well glass slides  
454 (Millipore). On the following day, cells were infected with SV40 at MOI of 100. After 48 h,  
455 cells were fixed with 4% PFA, permeabilized with 0.5% Triton X-100 and immunostained or  
456 treated with 0.5  $\mu\text{g/ml}$  Alexa Fluor 488-conjugated CtxB (Molecular Probes) to stain GM1.  
457 The following primary antibodies were used for immunofluorescence staining: anti-VP1  
458 (Abcam, ab #53977); anti-EEA1 (CellSignaling, #C45B10); anti-Rab7 (CellSignaling,  
459 #D95F2); anti-BiP (Abcam, ab #108615). The secondary antibodies donkey anti-mouse/anti-  
460 rabbit conjugated to Alexa Fluor-488 or -568 (Molecular Probes) were used. Stained samples  
461 were embedded in ProLong Gold (Invitrogen) and data were acquired on a spinning disk  
462 confocal microscope (Nikon). Images were analysed using Volocity software (Perkin Elmer).

463 For experiments involving Ras expression,  $2 \times 10^5$  CV-1 cells were plated on  
464 coverslips in six-well plates. Cells were transfected with WT or DN mEGFP-HRas using  
465 FuGENE6 (Promega) transfection reagent. On the following day, cells were infected with  
466 SV40 at MOI of 10. At 48 h.p.i., the cells were fixed and immunostained with a primary  
467 antibody against anti-VP1 (Abcam) and the secondary antibody anti-rabbit Alexa Fluor 568.  
468 Stained samples were embedded in ProLong Gold (Invitrogen) and data were acquired on a  
469 spinning disk confocal microscope (Nikon). Images were analyzed using Volocity software  
470 (Perkin Elmer). The plasmids encoding WT mEGFP-HRas (Plasmid #18662) and DN  
471 mEGFP-HRas S17N (Plasmid #18665) were purchased from Addgene.

472

473 Live-cell microscopy

474 CV-1 cells were plated at a density of  $1.5 \times 10^4$  on Lab-Tek II chambered coverglass slides  
475 (Nunc). On the following day, cells were infected with SV40 at MOI of 100. At 20 h.p.i., cells  
476 were co-transfected with plasmids encoding Lamp1-RFP and YFP-Rab5 using FuGENE6  
477 (Promega) transfection reagent. Time-lapse microscopy was started 40 h.p.i. Images were

478 acquired every 15 min on a Nikon spinning disk confocal microscope with Nikon perfect  
479 focus system and a LiveCell environmental chamber (Pathology Devices). Volocity software  
480 (PerkinElmer) and ImageJ were used for 4D image analysis.

481

#### 482 Generation of MKK4 knock-down CV-1 cells with shRNA

483 Three different shRNAs to MKK4 were generated using the MISSION library (Sigma) and a  
484 lentiviral system consisting of pRSV, pMDL and pVSV-G. Briefly, virus was produced by  
485 transfection of HEK293 cells with the transfer and packaging vectors using FuGENE6  
486 (Promega). At 24 and 48 h.p.i., virus-containing supernatant was filtered using a 0.45 µm  
487 nylon membrane filter and stored at -80°C. Pooled virus preparations were used for CV-1  
488 target cells transduction. About 24 h.p.i., puromycin treatment was started and maintained  
489 until the end of experiments. MKK4 knockdown was verified by qPCR.

490

491 The following MKK4 shRNAs were used in this study:

492 A12: TRCN0000001390

493 (CCGGCTTCTTATGGATTTGGATGTACTCGAGTACATCCAAATCCATAAGAAGTTT  
494 TT)

495 B1: TRCN0000001391

496 (CCGGGATGTATGAAGAACGTGCCGTCTCGAGACGGCACGTTCTTCATACATCTTT  
497 TT)

498 B3: TRCN0000001393

499 (CCGGGATATGATGTCCGCTCTGATGCTCGAGCATCAGAGCGGACATCATATCTTT  
500 TT)

501 Scrambled shRNA: SHC002

502 (CCGGCAACAAGATGAAGAGCACCAACTCGAGTTGGTGCTCTTCATCTTGTTGTTT  
503 TT)

504

505 Flow cytometry

506 Flow cytometry was done as previously described ((37)). Briefly, to stain for intracellular  
507 VP1 and large T antigen, cells were fixed and permeabilized with methanol or 4% PFA/0.5%  
508 Triton X-100 and subsequently stained with the primary antibodies PAb 597 and PAb108  
509 against VP1 and large T antigen, respectively. Alexa Fluor 488-labeled donkey anti-mouse  
510 antibody (Jackson Research) or goat anti-mouse APC were used as secondary antibodies.  
511 Data were acquired on an AccuriC6 or FACS Calibur flow cytometer (BD Biosciences) and  
512 analyzed with FlowJo software (Treestar).

513

514 LDH release assay

515 LDH release into the cell culture supernatant was quantified using the CytoTox 96 non-  
516 radioactive cytotoxicity assay (Promega) according to the manufacturer's instructions. Raw  
517 data were collected on a spectrophotometer at 490 nm. Values were calculated as follows: OD  
518 (infected sample) - OD (mock-infected sample) / OD (infected biological control) - OD  
519 (mock-infected biological control).

520

521 Data analysis

522 All data were primarily processed in Microsoft Excel. Statistical analysis and graph  
523 production was performed using Graphpad prism software. For statistical analysis of data, an  
524 unpaired t test was used.

525

526

527 **Acknowledgments**

528           We thank Thomas Magaldi for discussions and Jan Zulkeski for assistance in  
529 preparing this manuscript. This work was supported by grants from the NIH to D.D.  
530 (NS065719 and AI102876).

531



532 **References**

- 533 1. **Dalianis T, Hirsch HH.** 2013. Human polyomaviruses in disease and cancer. *Virology* **437**:63-  
534 72.
- 535 2. **Assetta B, Atwood WJ.** 2017. The biology of JC polyomavirus. *Biol Chem* **398**:839-855.
- 536 3. **Kaliyaperumal S, Dang X, Wuethrich C, Knight HL, Pearson C, MacKey J, Mansfield KG,**  
537 **Koralnik IJ, Westmoreland SV.** 2013. Frequent infection of neurons by SV40 virus in SIV-  
538 infected macaque monkeys with progressive multifocal leukoencephalopathy and  
539 meningoencephalitis. *Am J Pathol* **183**:1910-1917.
- 540 4. **Miskin DP, Koralnik IJ.** 2015. Novel syndromes associated with JC virus infection of neurons  
541 and meningeal cells: no longer a gray area. *Curr Opin Neurol* **28**:288-294.
- 542 5. **Dupzyk A, Tsai B.** 2016. How Polyomaviruses Exploit the ERAD Machinery to Cause Infection.  
543 *Viruses* **8**.
- 544 6. **Schelhaas M, Malmstrom J, Pelkmans L, Haugstetter J, Ellgaard L, Grunewald K, Helenius A.**  
545 2007. Simian Virus 40 depends on ER protein folding and quality control factors for entry into  
546 host cells. *Cell* **131**:516-529.
- 547 7. **Querbes W, Benmerah A, Tosoni D, Di Fiore PP, Atwood WJ.** 2004. A JC virus-induced signal  
548 is required for infection of glial cells by a clathrin- and eps15-dependent pathway. *J Virol*  
549 **78**:250-256.
- 550 8. **DuShane JK, Wilczek MP, Mayberry CL, Maginnis MS.** 2018. ERK Is a Critical Regulator of JC  
551 Polyomavirus Infection. *J Virol* **92**.
- 552 9. **Glenn GM, Eckhart W.** 1990. Transcriptional regulation of early-response genes during  
553 polyomavirus infection. *J Virol* **64**:2193-2201.
- 554 10. **O'Hara SD, Garcea RL.** 2016. Murine Polyomavirus Cell Surface Receptors Activate Distinct  
555 Signaling Pathways Required for Infection. *MBio* **7**.
- 556 11. **Zullo J, Stiles CD, Garcea RL.** 1987. Regulation of c-myc and c-fos mRNA levels by polyomavirus:  
557 distinct roles for the capsid protein VP1 and the viral early proteins. *Proc Natl Acad Sci U S A*  
558 **84**:1210-1214.
- 559 12. **Dangoria NS, Breau WC, Anderson HA, Cishek DM, Norkin LC.** 1996. Extracellular simian virus  
560 40 induces an ERK/MAP kinase-independent signalling pathway that activates primary  
561 response genes and promotes virus entry. *J Gen Virol* **77 ( Pt 9)**:2173-2182.
- 562 13. **Pelkmans L, Fava E, Grabner H, Hannus M, Habermann B, Krausz E, Zerial M.** 2005. Genome-  
563 wide analysis of human kinases in clathrin- and caveolae/raft-mediated endocytosis. *Nature*  
564 **436**:78-86.
- 565 14. **Daniels R, Rusan NM, Wadsworth P, Hebert DN.** 2006. SV40 VP2 and VP3 insertion into ER  
566 membranes is controlled by the capsid protein VP1: implications for DNA translocation out of  
567 the ER. *Mol Cell* **24**:955-966.
- 568 15. **Henriksen S, Hansen T, Bruun JA, Rinaldo CH.** 2016. The Presumed Polyomavirus Viroporin  
569 VP4 of Simian Virus 40 or Human BK Polyomavirus Is Not Required for Viral Progeny Release. *J*  
570 *Virol* **90**:10398-10413.
- 571 16. **Sweet BH, Hilleman MR.** 1960. The vacuolating virus, S.V. 40. *Proc Soc Exp Biol Med* **105**:420-  
572 427.
- 573 17. **Luo Y, Motamedi N, Magaldi TG, Gee GV, Atwood WJ, DiMaio D.** 2016. Interaction between  
574 Simian Virus 40 Major Capsid Protein VP1 and Cell Surface Ganglioside GM1 Triggers Vacuole  
575 Formation. *MBio* **7**:e00297.
- 576 18. **Magaldi TG, Buch MHC, Murata H, Erickson KD, Garcea RL, Peden K, Stehle T, DiMaio D.** 2012.  
577 Mutations in the GM1 binding site in SV40 VP1 alter receptor usage and cellular tropism. *J Virol*  
578 **86**:7028-7042.
- 579 19. **Miyamura T, Kitahara T.** 1975. Early cytoplasmic vacuolization of African green monkey kidney  
580 cells by SV40. *Arch Virol* **48**:147-156.
- 581 20. **Shubin AV, Demidyuk IV, Komissarov AA, Rafieva LM, Kostrov SV.** 2016. Cytoplasmic  
582 vacuolization in cell death and survival. *Oncotarget* **7**:55863-55889.

- 583 21. **Nagahama M, Itohayashi Y, Hara H, Higashihara M, Fukatani Y, Takagishi T, Oda M,**  
584 **Kobayashi K, Nakagawa I, Sakurai J.** 2011. Cellular vacuolation induced by *Clostridium*  
585 *perfringens* epsilon-toxin. *FEBS J* **278**:3395-3407.
- 586 22. **Overmeyer JH, Kaul A, Johnson EE, Maltese WA.** 2008. Active ras triggers death in  
587 glioblastoma cells through hyperstimulation of macropinocytosis. *Mol Cancer Res* **6**:965-977.
- 588 23. **Kaul A, Overmeyer JH, Maltese WA.** 2007. Activated Ras induces cytoplasmic vacuolation and  
589 non-apoptotic death in glioblastoma cells via novel effector pathways. *Cell Signal* **19**:1034-  
590 1043.
- 591 24. **Matallanas D, Arozarena I, Berciano MT, Aaronson DS, Pellicer A, Lafarga M, Crespo P.** 2003.  
592 Differences on the inhibitory specificities of H-Ras, K-Ras, and N-Ras (N17) dominant negative  
593 mutants are related to their membrane microlocalization. *J Biol Chem* **278**:4572-4581.
- 594 25. **Maltese WA, Overmeyer JH.** 2014. Methuosis: nonapoptotic cell death associated with  
595 vacuolization of macropinosome and endosome compartments. *Am J Pathol* **184**:1630-1642.
- 596 26. **Pezzarossa A, Zosel F, Schmidt T.** 2015. Visualization of HRas Domains in the Plasma  
597 Membrane of Fibroblasts. *Biophys J* **108**:1870-1877.
- 598 27. **Bhanot H, Young AM, Overmeyer JH, Maltese WA.** 2010. Induction of nonapoptotic cell death  
599 by activated Ras requires inverse regulation of Rac1 and Arf6. *Mol Cancer Res* **8**:1358-1374.
- 600 28. **Porat-Shliom N, Kloog Y, Donaldson JG.** 2008. A unique platform for H-Ras signaling involving  
601 clathrin-independent endocytosis. *Mol Biol Cell* **19**:765-775.
- 602 29. **Chinnapen DJ, Hsieh WT, te Welscher YM, Saslowsky DE, Kaoutzani L, Brandsma E, D'Auria**  
603 **L, Park H, Wagner JS, Drake KR, Kang M, Benjamin T, Ullman MD, Costello CE, Kenworthy AK,**  
604 **Baumgart T, Massol RH, Lencer WI.** 2012. Lipid sorting by ceramide structure from plasma  
605 membrane to ER for the cholera toxin receptor ganglioside GM1. *Dev Cell* **23**:573-586.
- 606 30. **Hancock JF.** 2003. Ras proteins: different signals from different locations. *Nat Rev Mol Cell Biol*  
607 **4**:373-384.
- 608 31. **Yamazaki T, Zaal K, Hailey D, Presley J, Lippincott-Schwartz J, Samelson LE.** 2002. Role of Grb2  
609 in EGF-stimulated EGFR internalization. *J Cell Sci* **115**:1791-1802.
- 610 32. **Chiu VK, Bivona T, Hach A, Sajous JB, Silletti J, Wiener H, Johnson RL, 2nd, Cox AD, Philips**  
611 **MR.** 2002. Ras signalling on the endoplasmic reticulum and the Golgi. *Nat Cell Biol* **4**:343-350.
- 612 33. **Clayson ET, Brando LV, Compans RW.** 1989. Release of simian virus 40 virions from epithelial  
613 cells is polarized and occurs without cell lysis. *J Virol* **63**:2278-2288.
- 614 34. **Chi S, Kitanaka C, Noguchi K, Mochizuki T, Nagashima Y, Shirouzu M, Fujita H, Yoshida M,**  
615 **Chen W, Asai A, Himeno M, Yokoyama S, Kuchino Y.** 1999. Oncogenic Ras triggers cell suicide  
616 through the activation of a caspase-independent cell death program in human cancer cells.  
617 *Oncogene* **18**:2281-2290.
- 618 35. **Raghava S, Giorda KM, Romano FB, Heuck AP, Hebert DN.** 2011. The SV40 late protein VP4 is  
619 a viroporin that forms pores to disrupt membranes for viral release. *PLoS Pathog* **7**:e1002116.
- 620 36. **Stroh LJ, Maginnis MS, Blaum BS, Nelson CD, Neu U, Gee GV, O'Hara BA, Motamedi N, DiMaio**  
621 **D, Atwood WJ, Stehle T.** 2015. The Greater Affinity of JC Polyomavirus Capsid for alpha2,6-  
622 Linked Lactoseries Tetrasaccharide c than for Other Sialylated Glycans Is a Major Determinant  
623 of Infectivity. *J Virol* **89**:6364-6375.
- 624 37. **Goodwin EC, Lipovsky A, Inoue T, Magaldi TG, Edwards APB, Van Goor KEY, Paton AW, Paton**  
625 **JC, Atwood WJ, Tsai B, DiMaio D.** 2011. BiP and multiple DNAJ molecular chaperones in the  
626 endoplasmic reticulum are required for efficient simian virus 40 infection. *mBio* **2**:101-111.

627

628

629

630 **FIGURE LEGENDS**

631 **Figure 1. Characterization of SV40-induced vacuoles.** (A) Corresponding representative  
632 fluorescence and bright-field images of SV40-infected CV-1 cells 48 h.p.i. after incubation  
633 with medium containing fluorescent Dextran-A488 (green). (B) Immunostaining and  
634 brightfield images of mock-infected and SV40-infected CV-1 cells 48 h.p.i. with antibodies  
635 recognizing markers of early endosome (EEA1), late (Rab7) endosome, and the endoplasmic  
636 reticulum (BiP), as indicated. (C) Fluorescence microscopy images of mock-infected and  
637 SV40-infected CV-1 cells pulse-labeled 48 h.p.i. with fluorescent GM1 (BODIPY-GM1,  
638 green). CV-1 cells expressing Lamp1-RFP (red) were visualized by confocal microscopy.  
639 Regions of interest (ROIs) 1 and 2 highlight vacuoles in infected cells showing BODIPY-  
640 GM1 in the limiting membranes and interior of Lamp1-positive vacuoles, respectively. Single  
641 planes of z-stacks are shown. (D) Fluorescence confocal microscopy and brightfield images of  
642 endogenous GM1 stained with fluorescent cholera toxin B (CtxB-Alexa488) (green) in mock-  
643 infected and SV40-infected CV-1 cells 48 h.p.i. Single planes of z-stacks are shown. ROI  
644 depicts CtxB-staining of vacuole membranes and intravacuolar GM1 in infected cells.

645  
646 **Figure 2. Dynamic vacuole formation.** (A) Image sequence (top to bottom) from a time-  
647 lapse movie (Movie S1) showing fusion of YFP-Rab5-positive vacuoles in an SV40-infected  
648 CV-1 cell. Lamp1-RFP is shown in red. Boxes outline two YFP-Rab5 vacuoles that fuse.  
649 Numbers in this and panel B show time in minutes. (B) Overview image and time series of  
650 four regions of interest (ROI 1 to 4) from time-lapse movie S2 showing YFP-Rab5 (green)  
651 dynamics on SV40-induced vacuoles (Movie S2). ROIs 1 and 2 show vacuoles that lose YFP-  
652 Rab5 fluorescence and ROIs 3 and 4 show vacuoles with stable YFP-Rab5 fluorescence.  
653 Lamp1-RFP is shown in red.

654

655 **Figure 3. Ras signaling is required for vacuole formation.** Fluorescence confocal  
656 microscopy images of SV40-infected CV-1 cells expressing wild-type (WT) or dominant-  
657 negative (DN) mEGFP-HRas (green). Forty-eight h.p.i., the localization of SV40 VP1 (red)  
658 was determined by immunostaining. The ROI depicts WT mEGFP-HRas accumulation at  
659 VP1-positive vacuoles. Single planes of z-stacks are shown.

660

661 **Figure 4. SV40-induced vacuole formation precedes cell lysis and virus release.** (A) Time  
662 series of vacuole formation after infection of CV-1 cells with wild-type SV40 at MOI of 10.  
663 Vacuolization was monitored by bright-field microscopy at the indicated h.p.i. (B) Western  
664 blot analysis of VP1 and actin expression in mock- and SV40-infected CV-1 cells at the  
665 indicated times p.i. Mock-infected cells at each time point were used as control. (C)

666 Quantitation of vacuolization, cell-associated SV40, cell lysis, and SV40 release over the time  
667 course of an SV40 infection. CV-1 cells were infected and the number of vacuolated cells at  
668 different time points after infection was quantified from bright-field images as depicted in  
669 (A). A minimum of 200 cells per sample and three independent experiments were analyzed.

670 Relative infectious units of cell-associated SV40 and released SV40 were quantified from cell  
671 lysates and supernatant, respectively, by titration onto CV-1 cells and flow cytometry analysis  
672 of large T antigen. CV-1 cell lysis was determined by quantitation of lactate dehydrogenase  
673 (LDH) in the supernatant using a colorimetric enzymatic assay, in which differences in the  
674 optical density between SV40-infected cells and mock-controls were determined. All values  
675 are displayed relative to 72 h.p.i. Mean +/- SEM from three independent experiments are  
676 shown.

677

678 **Figure 5. SV40 infection activates intracellular signaling pathways at late times after**  
679 **infection.** (A) Western blot analysis of phosphorylated and total p38, JNK and ERK in mock-  
680 infected or SV40-infected CV-1 cells 48 h.p.i. VP1 and  $\beta$ -actin expression are shown as

681 controls. **(B)** Western blot analysis of CV-1 cells over the time course of SV40 infection.  
682 Samples harvested at the indicated h.p.i. were analyzed for phosphorylated p38, JNK, ERK,  
683 MKK4, ATF2, and c-Jun, as well as for  $\beta$ -actin and VP1 expression.

684

685 **Figure 6. MAP kinase components are required for efficient vacuolization, cell lysis and**

686 **virus release.** **(A)** Inhibitors SP600125, Selumetinib, and SB203580 inhibit SV40-induced

687 phosphorylation of JNK, ERK, and p38, respectively. CV-1 cells were infected at MOI of 10.

688 Inhibitor treatment was started at 12 h.p.i. and immunoblotting was performed on extracts

689 prepared 48 h.p.i. **(B)** Bright-field images of CV-1 cells 48 h.p.i. after infection with SV40.

690 CV-1 cells were infected at MOI of 10 and treated with inhibitors against JNK, ERK, and p38

691 or DMSO vehicle at 12 h.p.i. **(C)** The number of vacuolated cells two days after infection was

692 quantified and normalized to DMSO-treated control cells. **(D)** Analysis of cell lysis two days

693 post-infection with SV40 in CV-1 cells treated with inhibitors. LDH activity in the

694 supernatant was measured. **(E)** The ratio of released SV40 in supernatant versus cell-

695 associated SV40 is shown. Data were normalized to DMSO-treated control cells.

696 (Quantitation of cell-associated SV40 and SV40 in the supernatant 48 h.p.i. of CV-1 cells

697 treated with JNK, ERK, and p38 inhibitors is shown in Supplemental Fig. S2.) The mean

698 values  $\pm$  SEM from three independent experiments are shown.

699

700 **Figure 7. MKK4 is required for efficient SV40-induced vacuolization, cell lysis, and**

701 **virus release.** **(A)** qPCR analysis of *mkk4* mRNA expression levels in CV-1 cells stably

702 expressing three different shRNAs targeting MKK4 (A12, B1, B3). Levels of mRNA were

703 normalized to mRNA in control cells expressing scrambled shRNA. **(B)** Images of SV40-

704 infected control and MKK4 knock-down cells. CV-1 cells stably expressing scrambled control

705 shRNA or MKK4 A12 or B1 shRNA were infected with SV40, and vacuole formation was

706 monitored by bright-field microscopy 48 h.p.i. Similar results were obtained with B3 shRNA.

707 (C) The number of vacuolated cells as in panel B was quantified and normalized to scrambled  
708 shRNA control cells. A minimum of 200 cells per sample were analyzed. The mean values +/-  
709 SEM from three independent experiments are shown. (D) CV-1 cells expressing three  
710 different MKK4 shRNAs were infected with SV40 and the supernatants were analyzed for  
711 LDH release 48 h.p.i. (E) The ratio of released SV40 in supernatant versus cell-associated  
712 SV40 is shown. (Quantitation of cell-associated SV40 and SV40 in supernatant of MKK4  
713 knock-down cells 48 h.p.i. is shown in Supplemental Figs. S3A and S3B.) Data were  
714 normalized to scrambled shRNA control cells.

715

716 **Figure 8. Rac1 activity is required for efficient SV40-induced vacuole formation, cell**  
717 **lysis, and virus release.** CV-1 cells were infected with SV40 at MOI of 10. At 12 h.p.i., the  
718 Rac1 inhibitor EHT1864 was added and cells were analyzed at 48 h.p.i.(A) Western blot  
719 analysis of MKK4 phosphorylation in SV40-infected CV-1 cells in the presence and absence  
720 of Rac1 inhibitor. (B) Infected CV-1 cells were treated with EHT1864 or DMSO control and  
721 photographed by bright-field microscopy. (C) Quantitation of vacuolated CV-1 cells after  
722 SV40 infection as described in Fig. 6D. (D) Infected CV-1 cells were treated with EHT1864.  
723 48 h.p.i. LDH released in the supernatant was determined. (E) The ratio of released SV40 in  
724 supernatant versus cell-associated SV40 is shown. To quantify virus release, infectious units  
725 of SV40 in cell lysates and supernatants were analyzed by infection and flow cytometry, as  
726 described in Figs. 2D-F. (Quantitation of cell-associated SV40 and SV40 in supernatant in  
727 Rac1 inhibitor-treated CV-1 cells 48 h.p.i. is shown in Supplemental Figs. S4A and S4B.)

728

729 **Supplemental Figure S1. Expression of dominant-negative Ras does not affect infection**

730 **levels of CV-1 cells.** CV-1 cells were transfected with wild-type mEGFP-HRas (WT) or  
731 dominant-negative mEGFP-HRas S17N (DN), respectively. Twelve hours p.i., cells were  
732 infected with SV40 at MOI of 10. At 24 h.p.i., cells were harvested and stained for large T  
733 antigen. Cells were analyzed by flow cytometry for GFP and T antigen fluorescence. The  
734 fraction of infected cells in the GFP<sup>+</sup> population is shown.

735

736 **Supplemental Figure S2. Effect of MAPK inhibitors on SV40 replication and cell**

737 **viability. (A)** ERK inhibitor reduces cell viability as assessed by LDH release. Mock-infected  
738 CV-1 cells were treated with ERK inhibitor or vehicle alone for 36 h and read out for LDH  
739 activity in the cell supernatant. Depicted is the mean of three independent experiments +/-  
740 SEM. **(B)** Treatment with JNK Inhibitor SP600125 reduces release of SV40 from infected  
741 cells. CV-1 cells were infected at MOI of 10. Inhibitor treatment was started at 12 h.p.i. and  
742 infectious units in the supernatant were quantified at 48 h.p.i. **(C)** Treatment with JNK  
743 inhibitor does not affect virus production. CV-1 cells were treated as in **(B)**. Infectious units  
744 were quantified in cells at 48 h.p.i. **(D)** Inhibitor treatment of CV-1 cells does not influence  
745 SV40 infectivity. CV-1 cells were infected at MOI of 10 and treated with inhibitors against  
746 JNK, ERK, and p38 or DMSO vehicle at the time of infection (0 h.p.i. – black bars) or 12  
747 h.p.i. (red bars). At 24 h.p.i., cells were harvested, stained for expression of large T antigen,  
748 and read out by flow cytometry.

749

750 **Supplemental Figure S3. MKK4 knock-down reduces SV40 release while maintaining**

751 **infection levels and virus replication. (A)** MKK4 knockdown does not affect virus  
752 production. CV-1 cells expressing shRNAs to MKK4 or scrambled shRNA were infected with  
753 SV40 at MOI of 10. At 48 h.p.i., cells were harvested for quantitation of infectious units.

754 **(B)** MKK4 is required for efficient virus release. Experiments were set up as in (A). At 48  
755 h.p.i., infectious units were quantified in the supernatant **(C, D)**. MKK4 knockdown does not  
756 influence SV40 infectivity or replication. Experiments were set up as described in **(A)**. **(C)** At  
757 24 h.p.i. infected cells were harvested and subjected to large T antigen staining for  
758 determination of infection levels. Depicted is the mean of three experiments +/-SEM. **(D)** At  
759 48 h.p.i., expression levels of the early protein large T antigen and the late protein VP1 were  
760 determined by immunoblotting.

761

762 **Supplemental Figure S4. Effect of Rac1 inhibitor EHT1864 on SV40 replication. (A)**

763 Rac1 inhibition increases levels of cell associated virus. CV-1 cells were infected at MOI of  
764 10. Inhibitor treatment was started at 12 h.p.i. and cell-associated infectious units were  
765 quantified at 48 h.p.i. **(B)** Treatment with Rac1 Inhibitor EHT1864 reduces release of SV40  
766 from infected cells. CV-1 cells were treated as in (A). Infectious units in the supernatant were  
767 quantified at 48 h.p.i. **(C)** Inhibitor treatment of CV-1 cells does not influence SV40  
768 infectivity. CV-1 cells were infected at MOI of 10 and treated with Rac 1 inhibitor EHT1864  
769 or DMSO vehicle at the time of infection (0 h.p.i. – black bars) or 12 h.p.i (red bars). At 24  
770 h.p.i., cells were harvested, stained for expression of large T antigen, and read out by flow  
771 cytometry.

772



## **Movie Legends**

### **Suppl. Movie S1**

**Vacuole Fusion.** Time-lapse movie showing fusion of YFP-Rab5-positive vacuoles in an SV40-infected CV1 cell. Rab5-YFP is shown in green; Lamp1-RFP is shown in red.

### **Suppl. Movie S2**

**Vacuole dynamics.** Time-lapse movie showing dynamics of SV40-induced vacuole maturation in an SV40-infected CV1 cell. Rab5-YFP is shown in green; Lamp1-RFP is shown in red.

# Figure 1

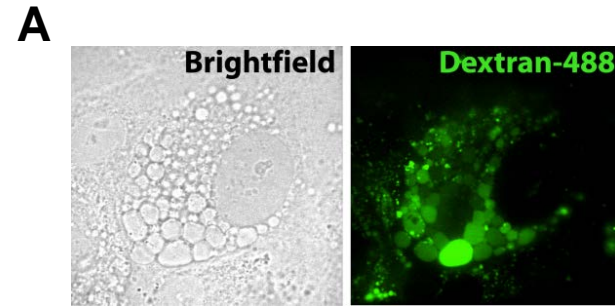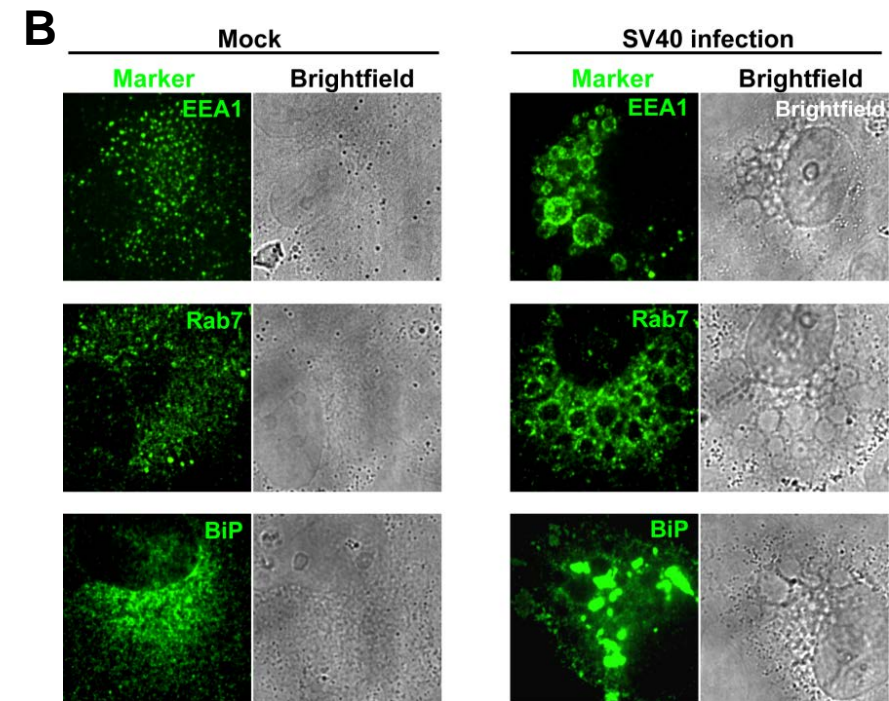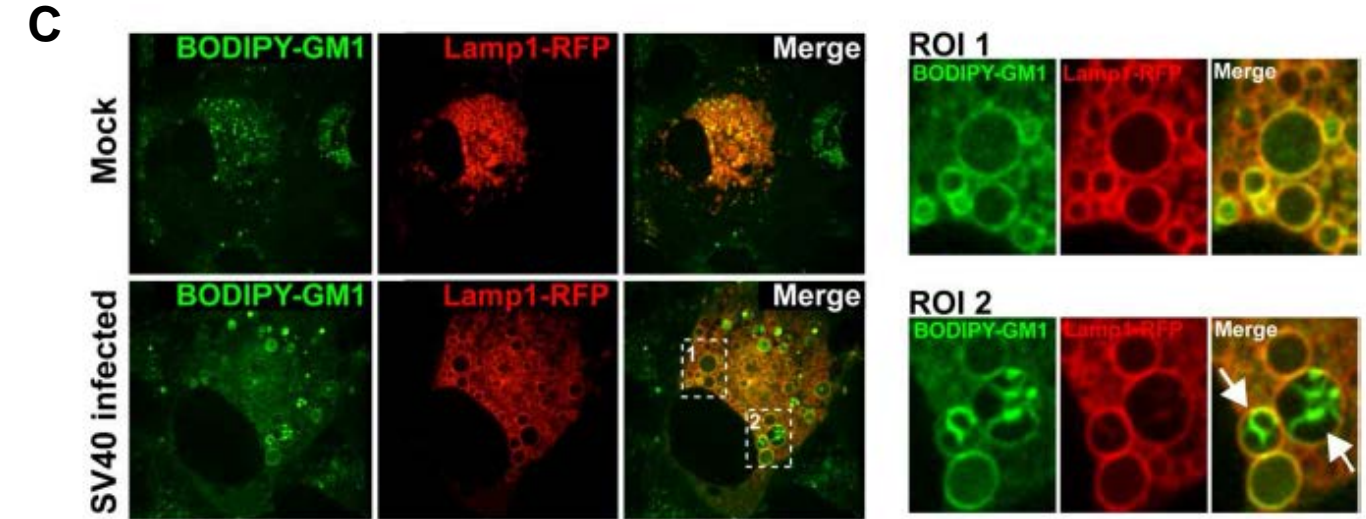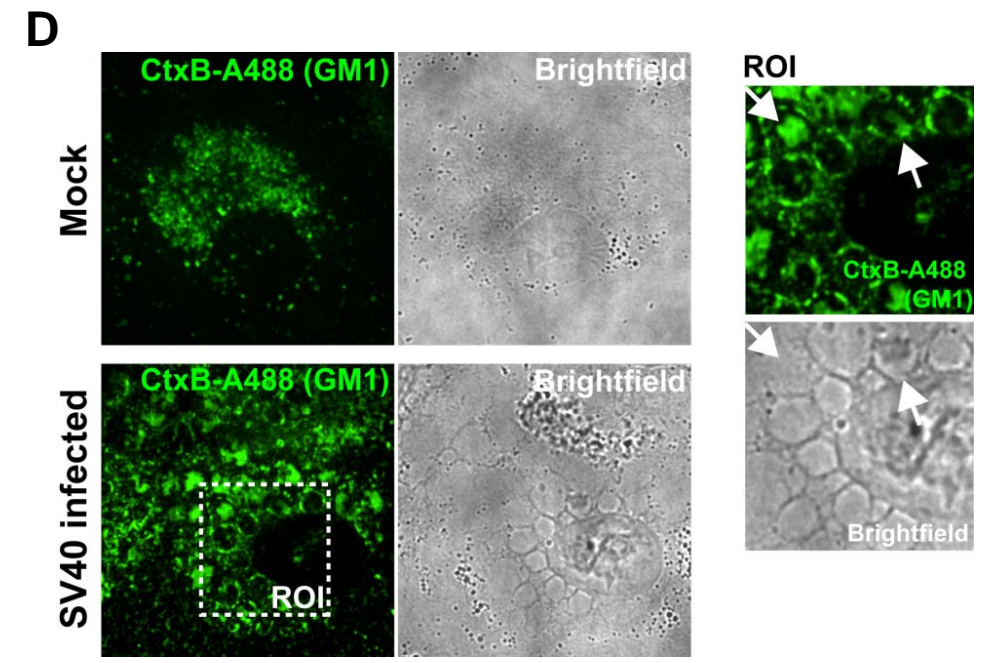

# Figure 2

**A**

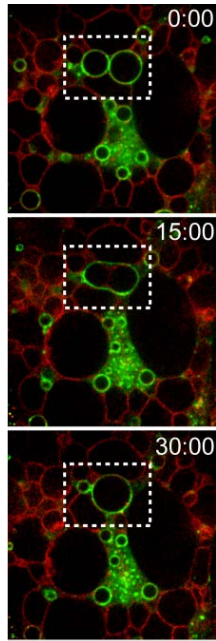

YFP-Rab5  
Lamp1-RFP

**B**

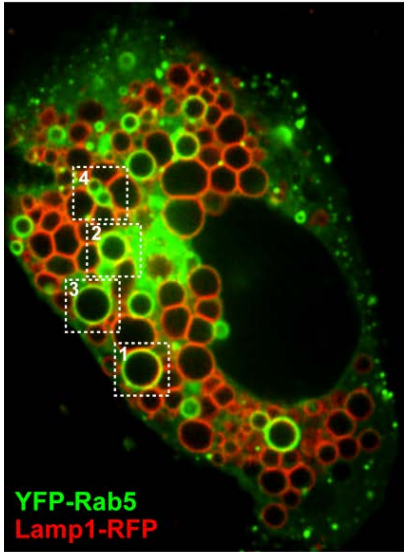

Vacuoles losing Rab5:

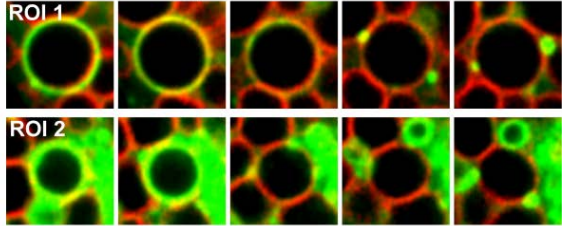

Vacuoles not losing Rab5:

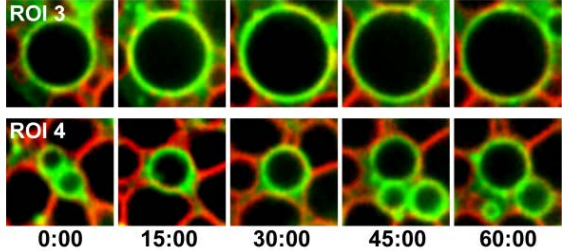

Figure 3

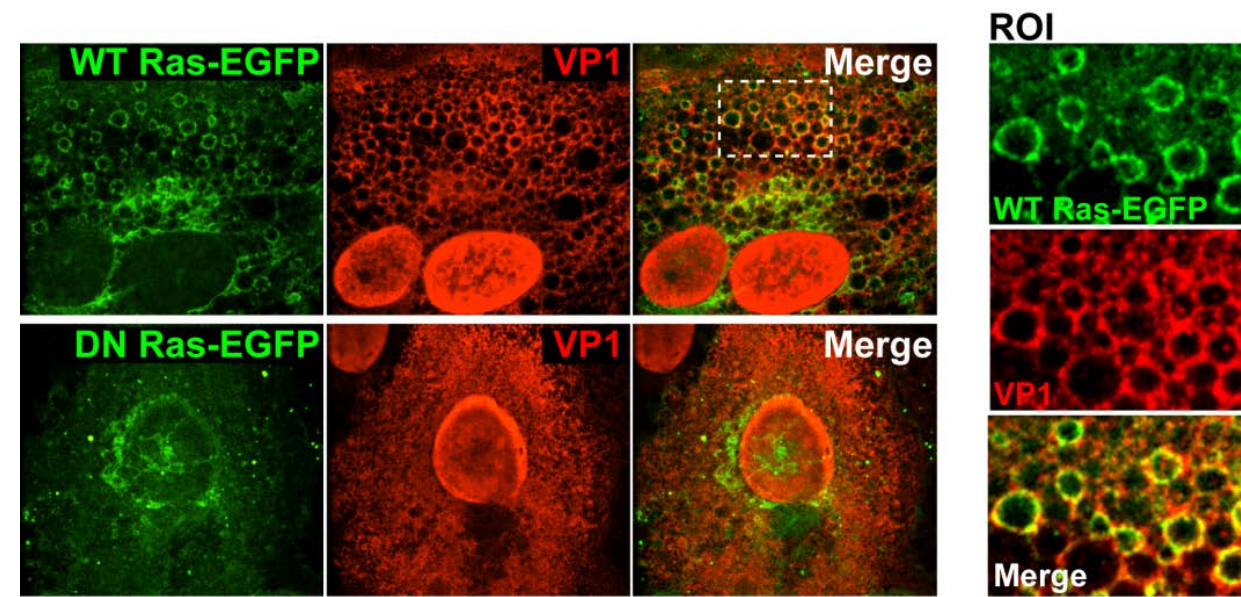

# Figure 4

**A**

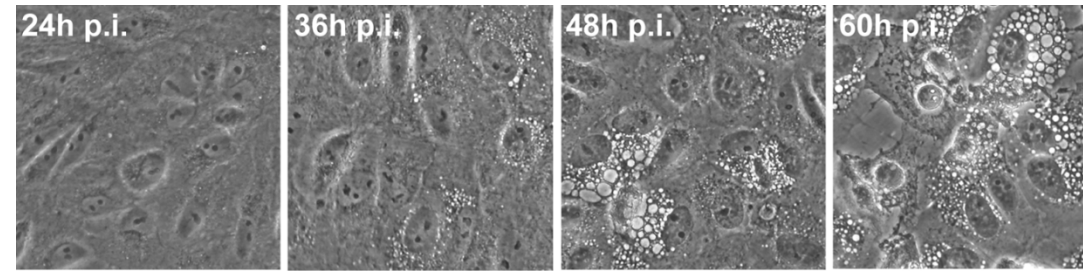

**B**

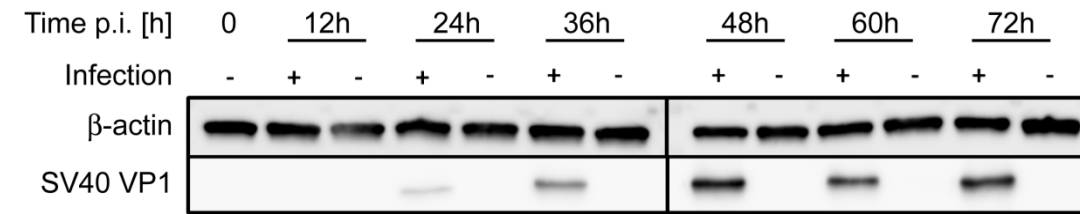

**C**

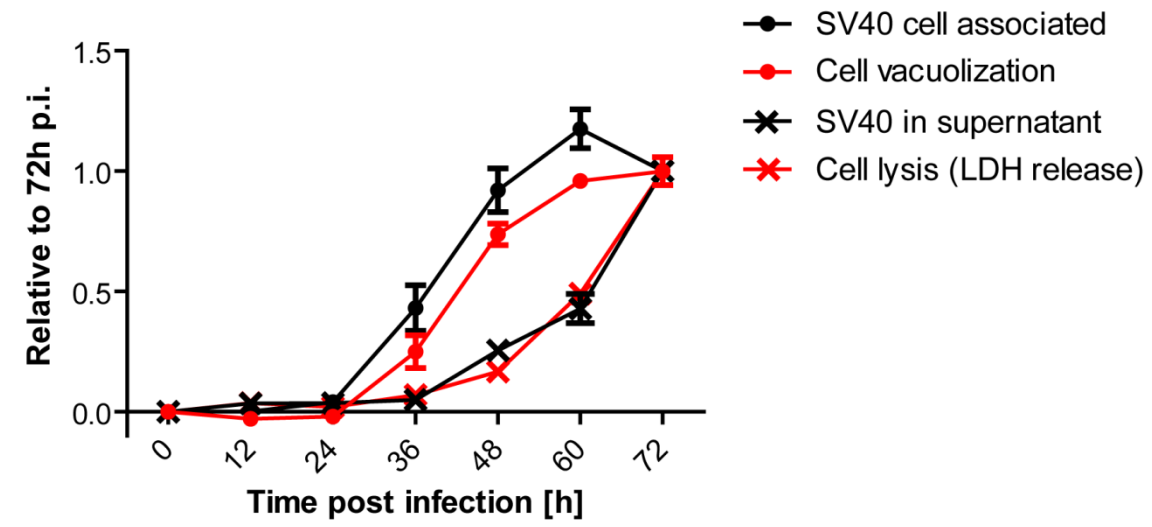



# Figure 6

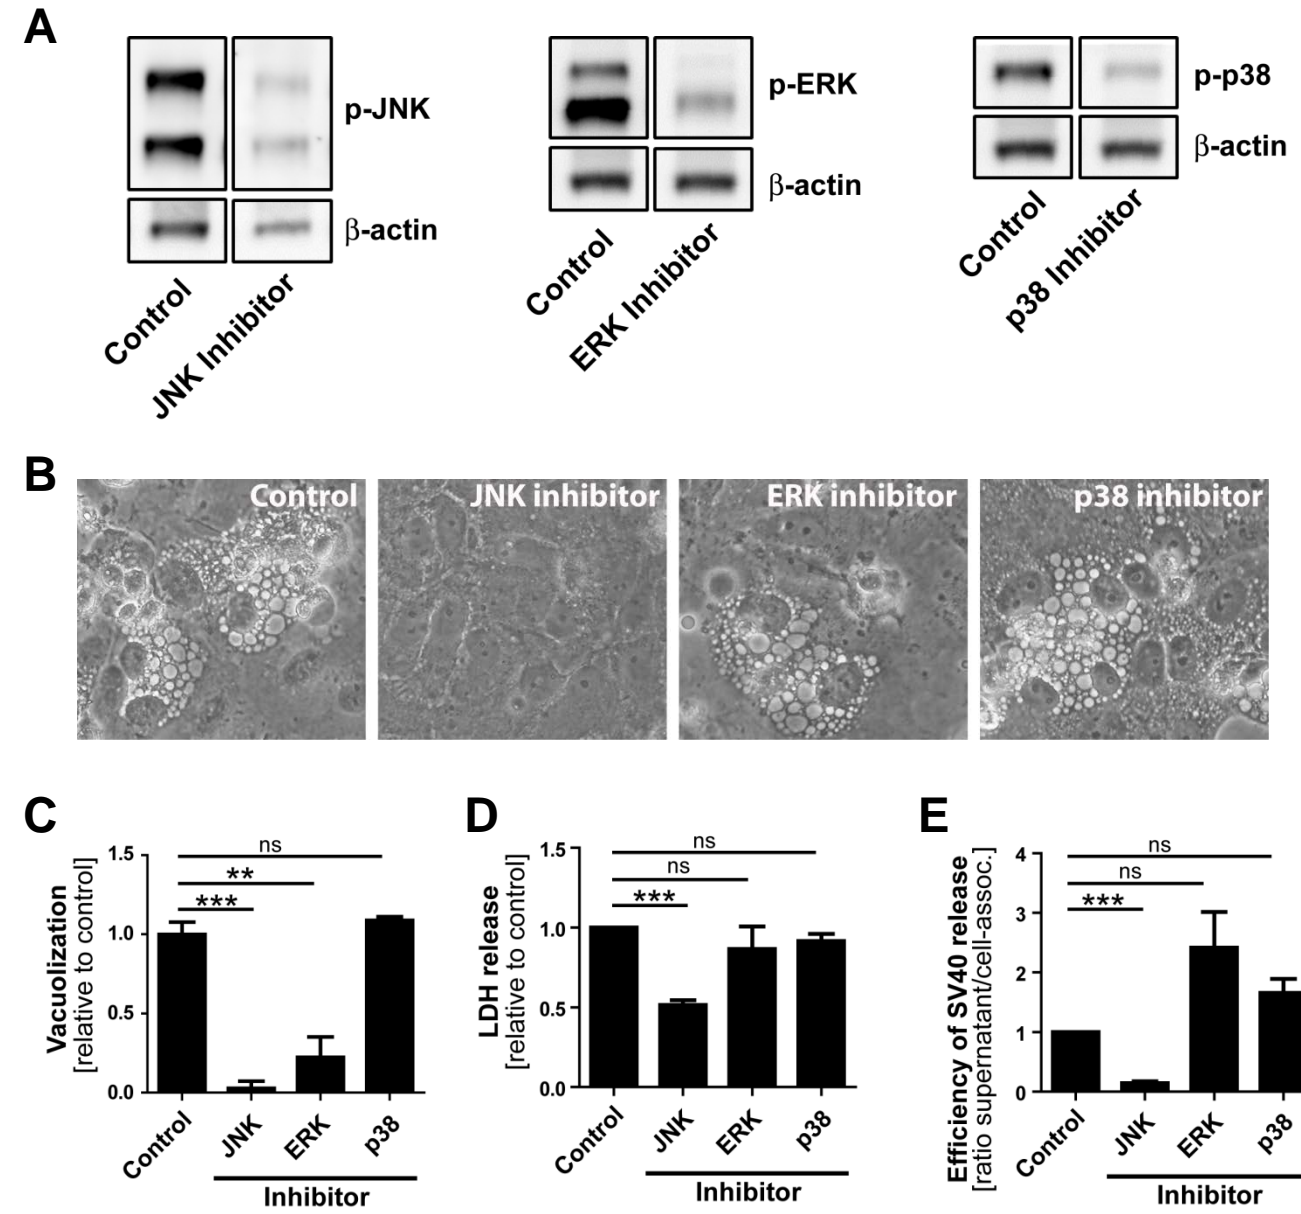

# Figure 7

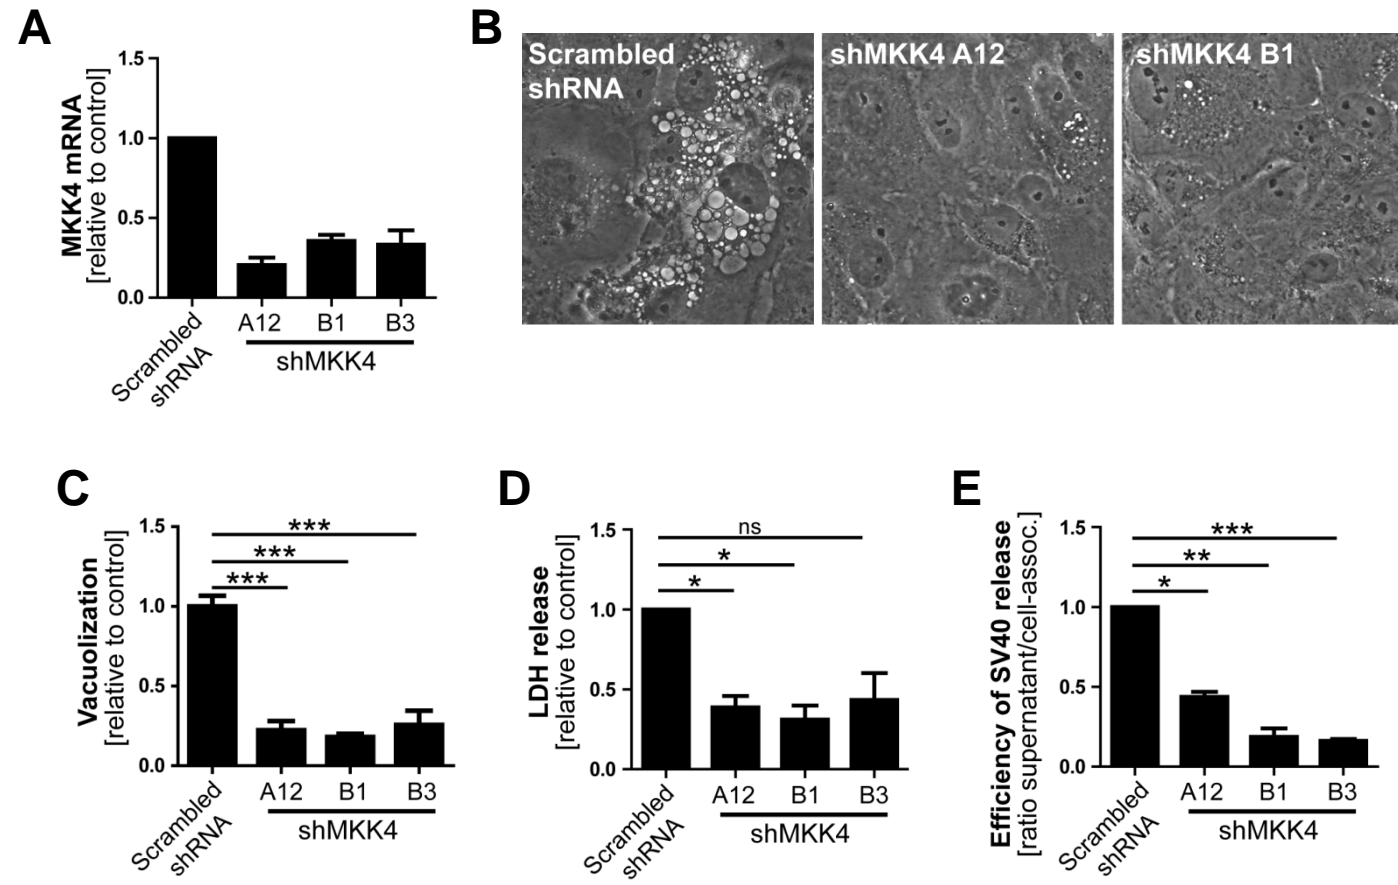



# Figure 8

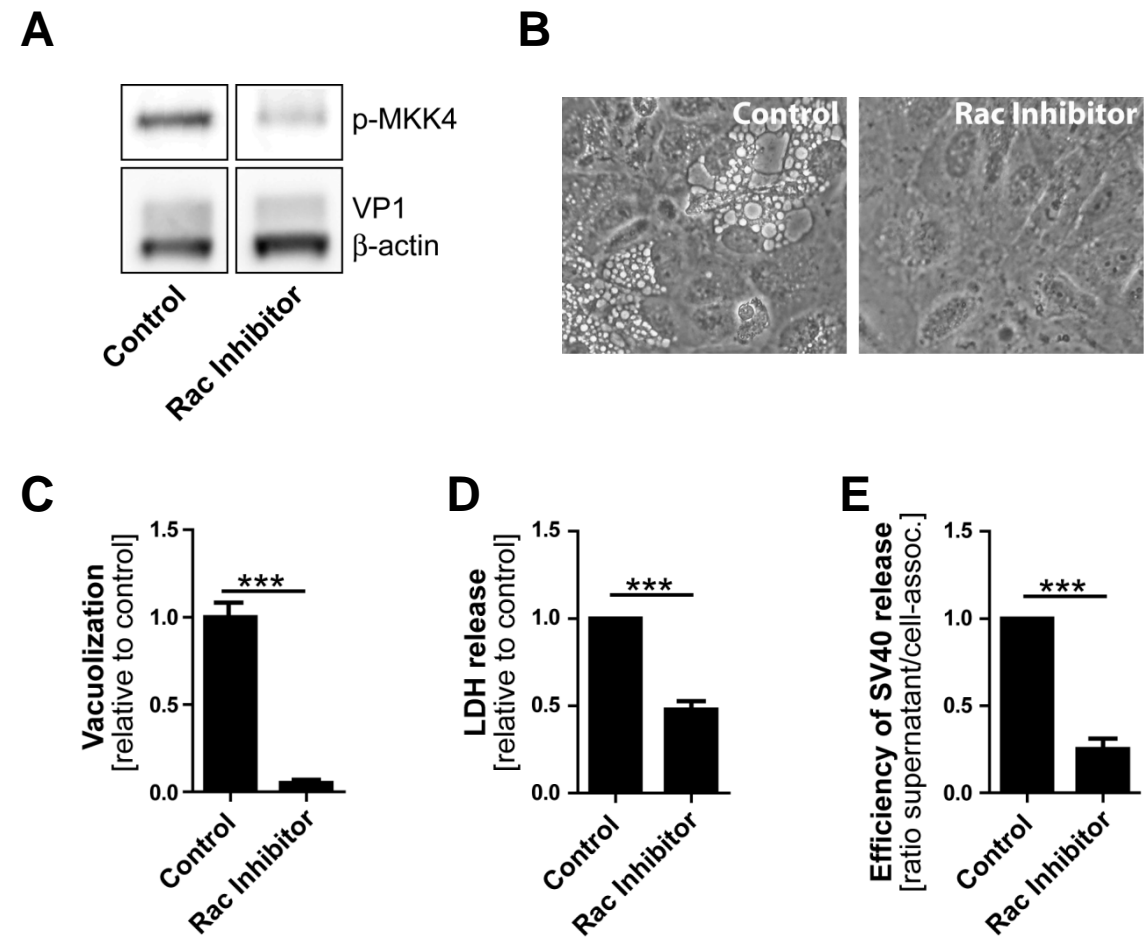

## Suppl. Figure S1

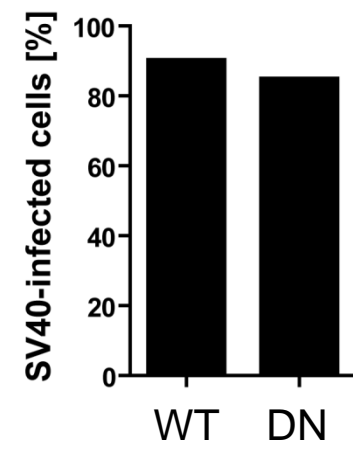

# Suppl. Figure S2

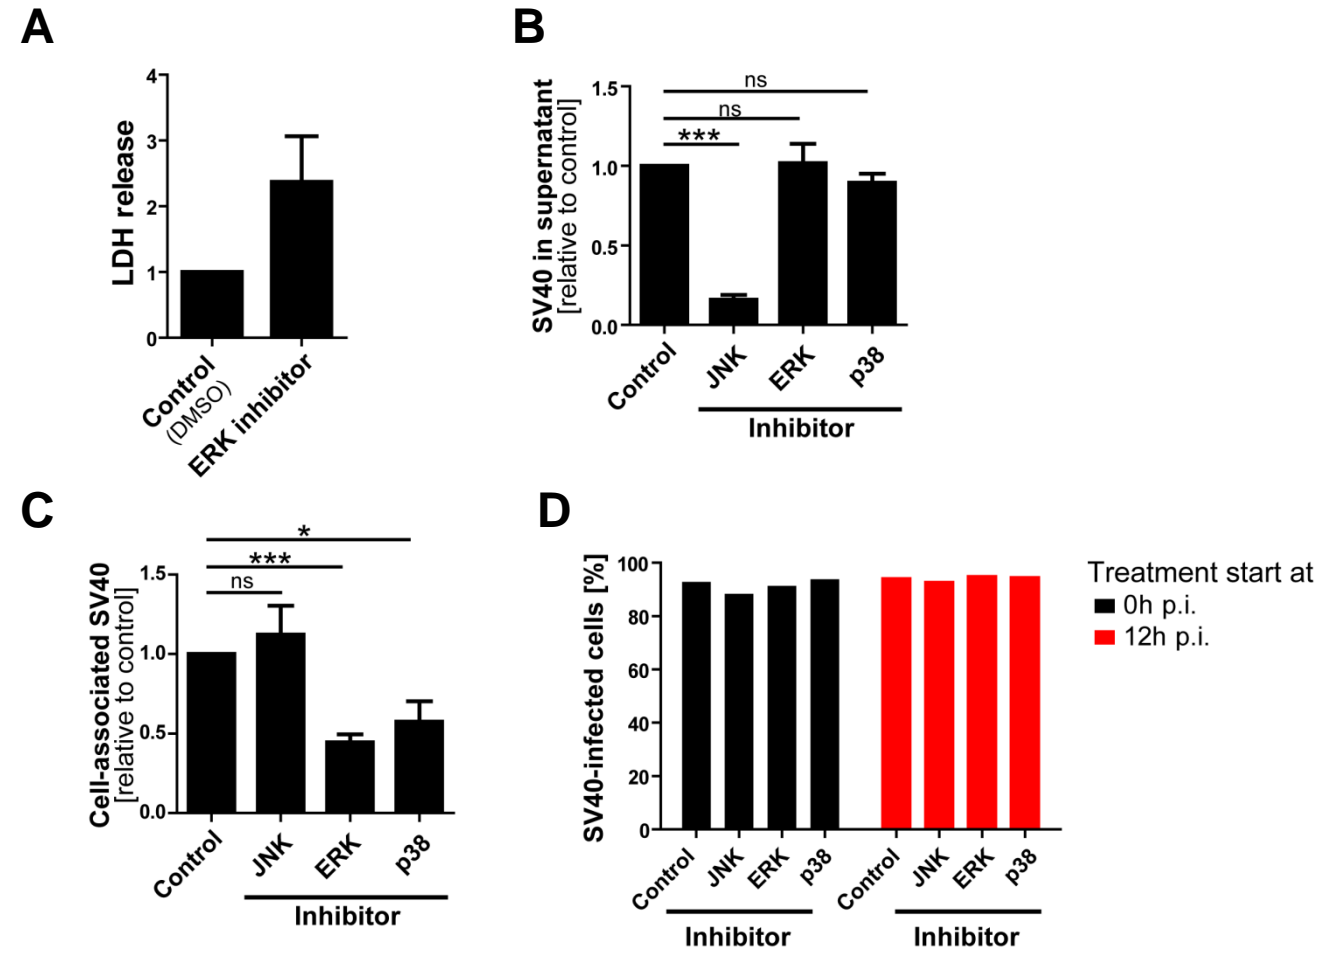

# Suppl. Figure S3

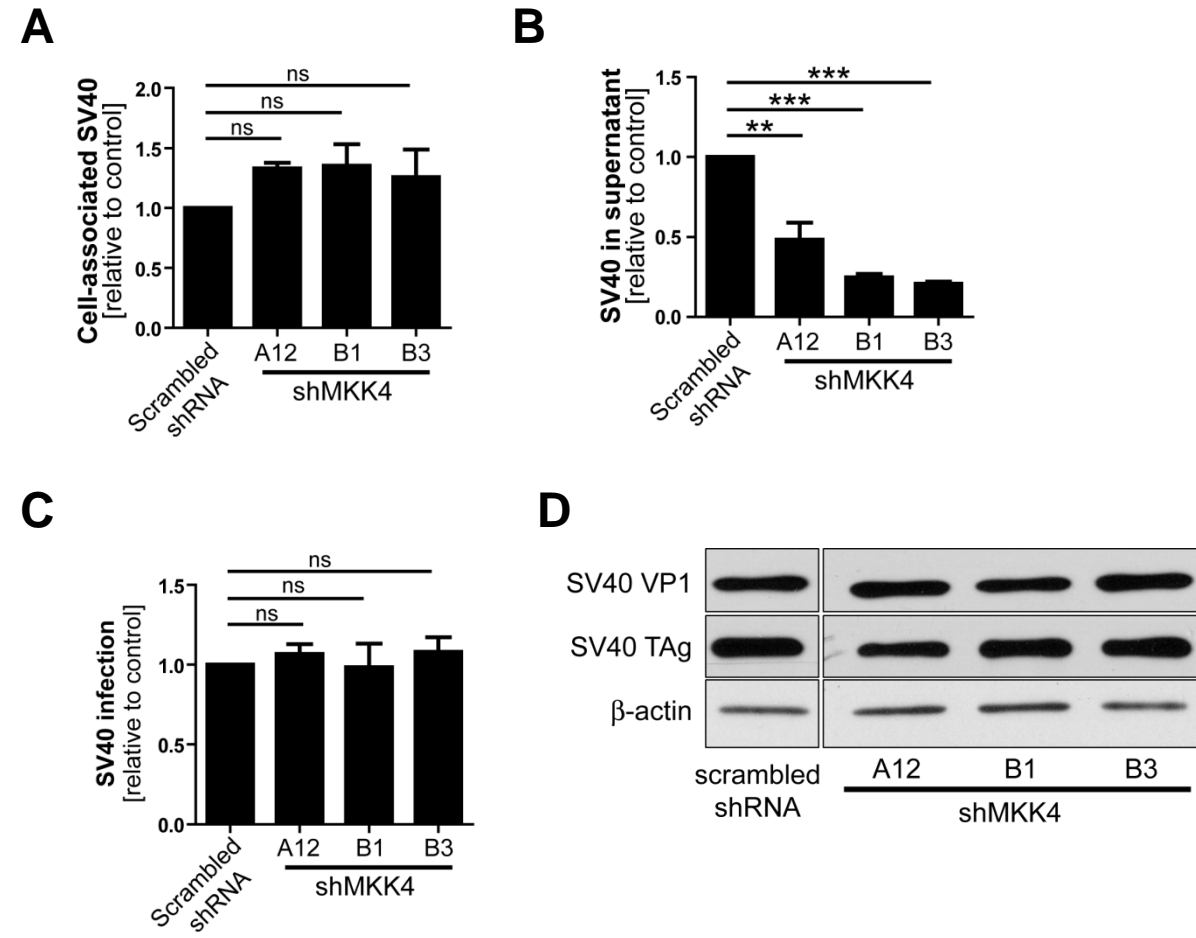

# Suppl. Figure S4

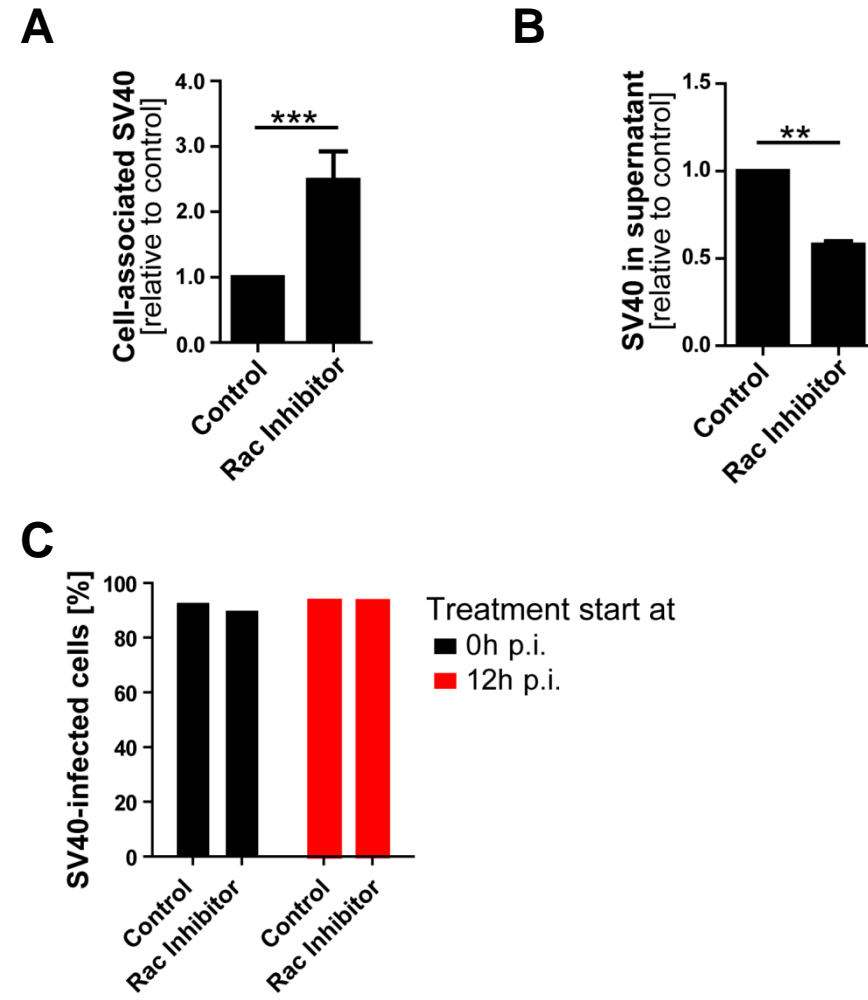

Source: https://www.biorxiv.org/content/10.1101/454850v1.full.pdf
